# Supplementary material for: An electrochemically fabricated cobalt iron oxyhydroxide bifunctional electrode for an anion exchange membrane water electrolyzer
Source: Royal Society of Chemistry journal article supplement (doi:10.1039/d3dt00307h), 2023-01-01
Supplement: d3dt00307h1.pdf [file d3dt00307h1.pdf]

## Electronic Supplementary Information

### **An electrochemically fabricated cobalt iron oxyhydroxide bifunctional electrode for an anion exchange membrane water electrolyzer**

Seokjin Hong<sup>a,1</sup>, Hyunki Kim<sup>a,1</sup>, Ho Won Jang<sup>b,\*</sup>, Soo Young Kim<sup>c,\*</sup>, and Sang Hyun Ahn<sup>a,\*</sup>

<sup>a</sup>*School of Chemical Engineering and Material Science, Chung-Ang University, Seoul 06974, Republic of Korea*

<sup>b</sup>*Department of Materials Science and Engineering, Research Institute of Advanced Materials, Seoul National University, Seoul 08826, Republic of Korea*

<sup>c</sup>*Department of Materials Science and Engineering, Korea University, Seoul 02841, Republic of Korea*

\*Corresponding authors.

E-mail: shahn@cau.ac.kr (Sang Hyun Ahn), sooyoungkim@korea.ac.kr (Soo Young Kim),

hwjang@snu.ac.kr (Ho Won Jang)

<sup>1</sup>These authors contributed equally to this work.

**Table S1** Electrodeposition condition of of  $\text{CoO}_x\text{H}_y/\text{TP}$ ,  $\text{Co}_z\text{Fe}_{1-z}\text{O}_x\text{H}_y/\text{TP}$ , and  $\text{FeO}_x\text{H}_y/\text{TP}$ 

| Electrodes                                                   | Electrolyte concentration (mM)            |                                           |                          |                                             | Deposition conditions          |          |
|--------------------------------------------------------------|-------------------------------------------|-------------------------------------------|--------------------------|---------------------------------------------|--------------------------------|----------|
|                                                              | $\text{CoSO}_4 \cdot 7\text{H}_2\text{O}$ | $\text{FeSO}_4 \cdot 7\text{H}_2\text{O}$ | $\text{Na}_2\text{SO}_4$ | $\text{Na}_3\text{C}_6\text{H}_5\text{O}_7$ | Potential ( $V_{\text{SCE}}$ ) | Time (s) |
| $\text{CoO}_x\text{H}_y/\text{TP}$                           | 35.0                                      | -                                         | 100.0                    | 100.0                                       | -1.8                           | 600.0    |
| $\text{Co}_{65}\text{Fe}_{35}\text{O}_x\text{H}_y/\text{TP}$ | 30.0                                      | 5.0                                       | 100.0                    | 100.0                                       | -1.8                           | 600.0    |
| $\text{Co}_{52}\text{Fe}_{48}\text{O}_x\text{H}_y/\text{TP}$ | 17.5                                      | 17.5                                      | 100.0                    | 100.0                                       | -1.8                           | 600.0    |
| $\text{Co}_{47}\text{Fe}_{53}\text{O}_x\text{H}_y/\text{TP}$ | 10.0                                      | 25.0                                      | 100.0                    | 100.0                                       | -1.8                           | 600.0    |
| $\text{FeO}_x\text{H}_y/\text{TP}$                           | -                                         | 35.0                                      | 100.0                    | 100.0                                       | -1.8                           | 600.0    |

**Table S2** HER and OER performances of  $\text{CoO}_x\text{H}_y/\text{TP}$ ,  $\text{Co}_z\text{Fe}_{1-z}\text{O}_x\text{H}_y/\text{TP}$ , and  $\text{FeO}_x\text{H}_y/\text{TP}$ 

| Electrode                                                    | Co/Fe ratio | Overpotential<br>@ 10 mA<br>$\text{cm}_{\text{geo}}^{-2}$<br>(mV) | Tafel slope for<br>OER<br>( $\text{mV dec}^{-1}$ ) | Overpotential<br>@ -10 mA<br>$\text{cm}_{\text{geo}}^{-2}$<br>(mV) | Tafel slope for<br>HER<br>( $\text{mV dec}^{-1}$ ) |
|--------------------------------------------------------------|-------------|-------------------------------------------------------------------|----------------------------------------------------|--------------------------------------------------------------------|----------------------------------------------------|
| $\text{CoO}_x\text{H}_y/\text{TP}$                           | -           | 385                                                               | 97                                                 | 152                                                                | 112                                                |
| $\text{Co}_{65}\text{Fe}_{35}\text{O}_x\text{H}_y/\text{TP}$ | 1.86        | 335                                                               | 57                                                 | 150                                                                | 75                                                 |
| $\text{Co}_{52}\text{Fe}_{48}\text{O}_x\text{H}_y/\text{TP}$ | 1.08        | 357                                                               | 47                                                 | 151                                                                | 77                                                 |
| $\text{Co}_{47}\text{Fe}_{53}\text{O}_x\text{H}_y/\text{TP}$ | 0.89        | 375                                                               | 71                                                 | 198                                                                | 67                                                 |
| $\text{FeO}_x\text{H}_y/\text{TP}$                           | 0           | 481                                                               | 92                                                 | 292                                                                | 94                                                 |

**Table S3** Operation conditions and performances of AEMWE using bifunctional  $\text{Co}_{65}\text{Fe}_{35}\text{O}_x\text{H}_y/\text{TP}$  and previously reported non noble metal-based electrodes

| Catalyst<br>(Anode and cathode)                               | MEA configuration |                 | Electrolyte<br>( $\text{cm}^{-3} \text{min}^{-1}$ ) | Operating<br>temperature<br>( $^{\circ}\text{C}$ ) | Current density<br>@ 2.0 $V_{\text{cell}}$<br>( $\text{A cm}^{-2}$ ) | Reference  |
|---------------------------------------------------------------|-------------------|-----------------|-----------------------------------------------------|----------------------------------------------------|----------------------------------------------------------------------|------------|
|                                                               | Membrane          | MEA fabrication |                                                     |                                                    |                                                                      |            |
| $\text{Co}_{65}\text{Fe}_{35}\text{O}_x\text{H}_y/\text{TP}$  | X37-50            | CCS             | 1 M KOH<br>(20)                                     | 50                                                 | 0.61                                                                 | This study |
| $\text{Fe}_{0.2}\text{Ni}_{0.8}\text{-P}_{0.5}\text{S}_{0.5}$ | FAA-3-50          | CCS             | 1 M KOH<br>(50)                                     | 60                                                 | 2.5                                                                  | 48         |
| Ni foam                                                       | C-PVA-ABPBI       | CCM             | 15 wt% KOH<br>(-)                                   | 70                                                 | 0.45                                                                 | 49         |
| $\text{VCoCO}_x$                                              | FAA-3-50          | CCS             | 1 M KOH<br>(-)                                      | 45                                                 | 0.20                                                                 | 50         |
| Ni foam                                                       | PF-41             | -               | 20 wt% KOH<br>(1)                                   | 60                                                 | 0.8                                                                  | 51         |
| Ni foam                                                       | PAEK-APMBI        | -               | 10 wt% KOH<br>(-)                                   | 60                                                 | 0.64                                                                 | 52         |
| Ni foam                                                       | FAA-3             | -               | 10 wt% KOH<br>(-)                                   | 60                                                 | 0.03                                                                 | 53         |
| $\text{NiCo}_2\text{O}_4\text{-HSp}$                          | PAni-1.03         | CCS             | 1 M KOH<br>(10)                                     | 50                                                 | 0.4 @ 2 V                                                            | 54         |
| $\text{Ni}_{12}\text{P}_5/\text{Ni}_3(\text{PO}_4)_2$         | YAB               | CCS             | 1 M KOH<br>(5)                                      | 50                                                 | 0.36 @ 1.87 V                                                        | 55         |
| Ni                                                            | A201              | CCS             | 1 M KOH<br>(1)                                      | 50                                                 | 0.19 @ 1.8 V                                                         | 56         |
| CoPNS                                                         | YAB               | CCS             | 1 M KOH<br>(5)                                      | 50                                                 | 0.42 @ 1.8 V                                                         | 57         |

(a)

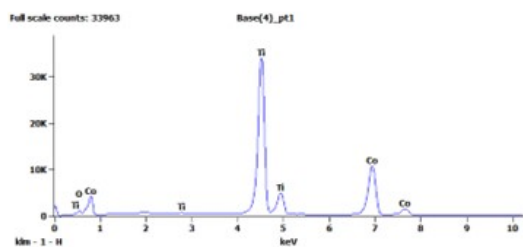

(b)

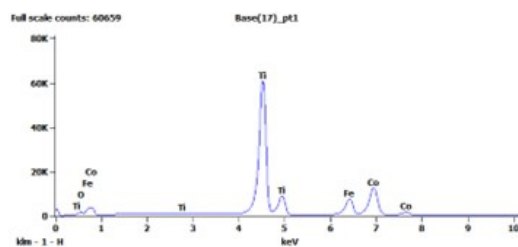

(c)

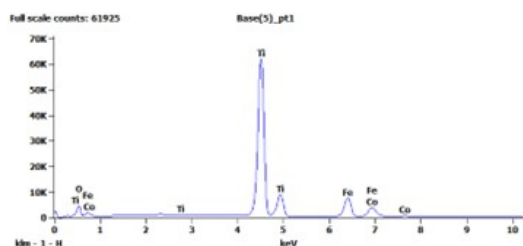

(d)

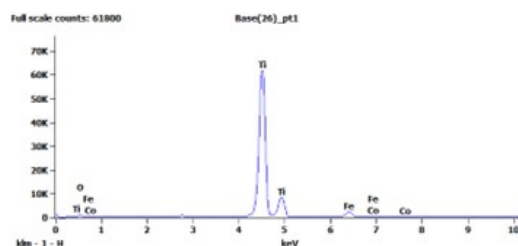

(e)

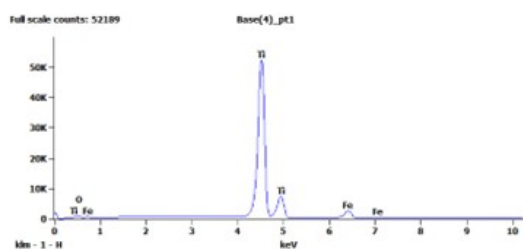

**Fig. S1** EDS spectra for (a)  $\text{CoO}_x\text{H}_y/\text{TP}$ , (b)  $\text{Co}_{65}\text{Fe}_{35}\text{O}_x\text{H}_y/\text{TP}$ , (c)  $\text{Co}_{52}\text{Fe}_{48}\text{O}_x\text{H}_y/\text{TP}$ , (d)  $\text{Co}_{47}\text{Fe}_{53}\text{O}_x\text{H}_y/\text{TP}$ , and (e)  $\text{FeO}_x\text{H}_y/\text{TP}$ .

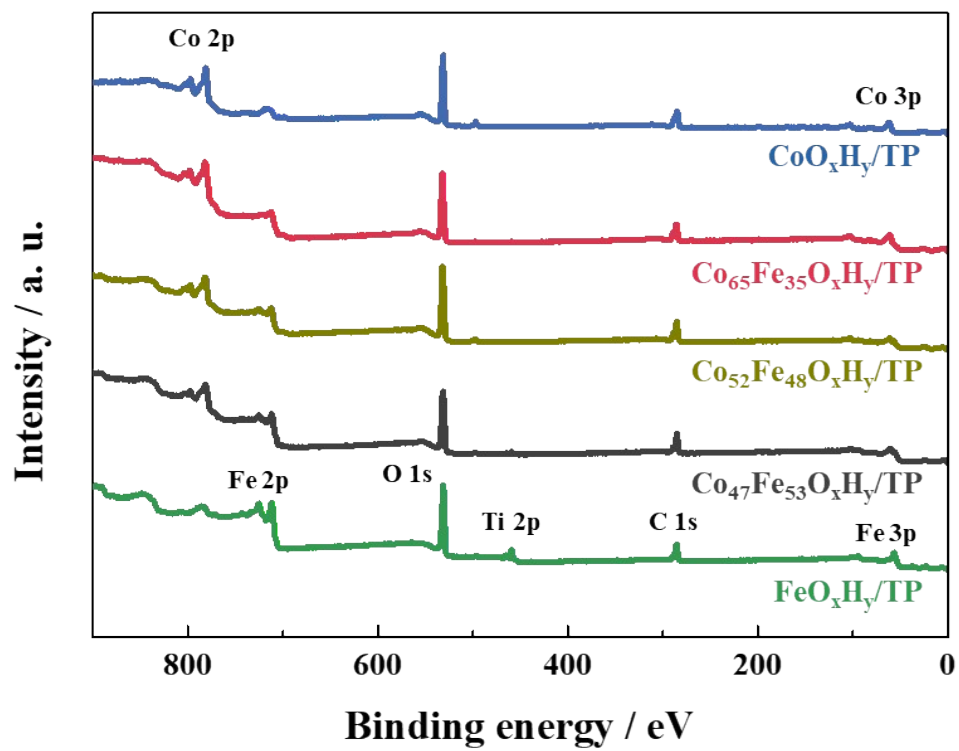

**Fig. S2** XPS spectra of  $\text{CoO}_x\text{H}_y/\text{TP}$ ,  $\text{Co}_2\text{Fe}_{1-z}\text{O}_x\text{H}_y/\text{TP}$ , and  $\text{FeO}_x\text{H}_y/\text{TP}$ .

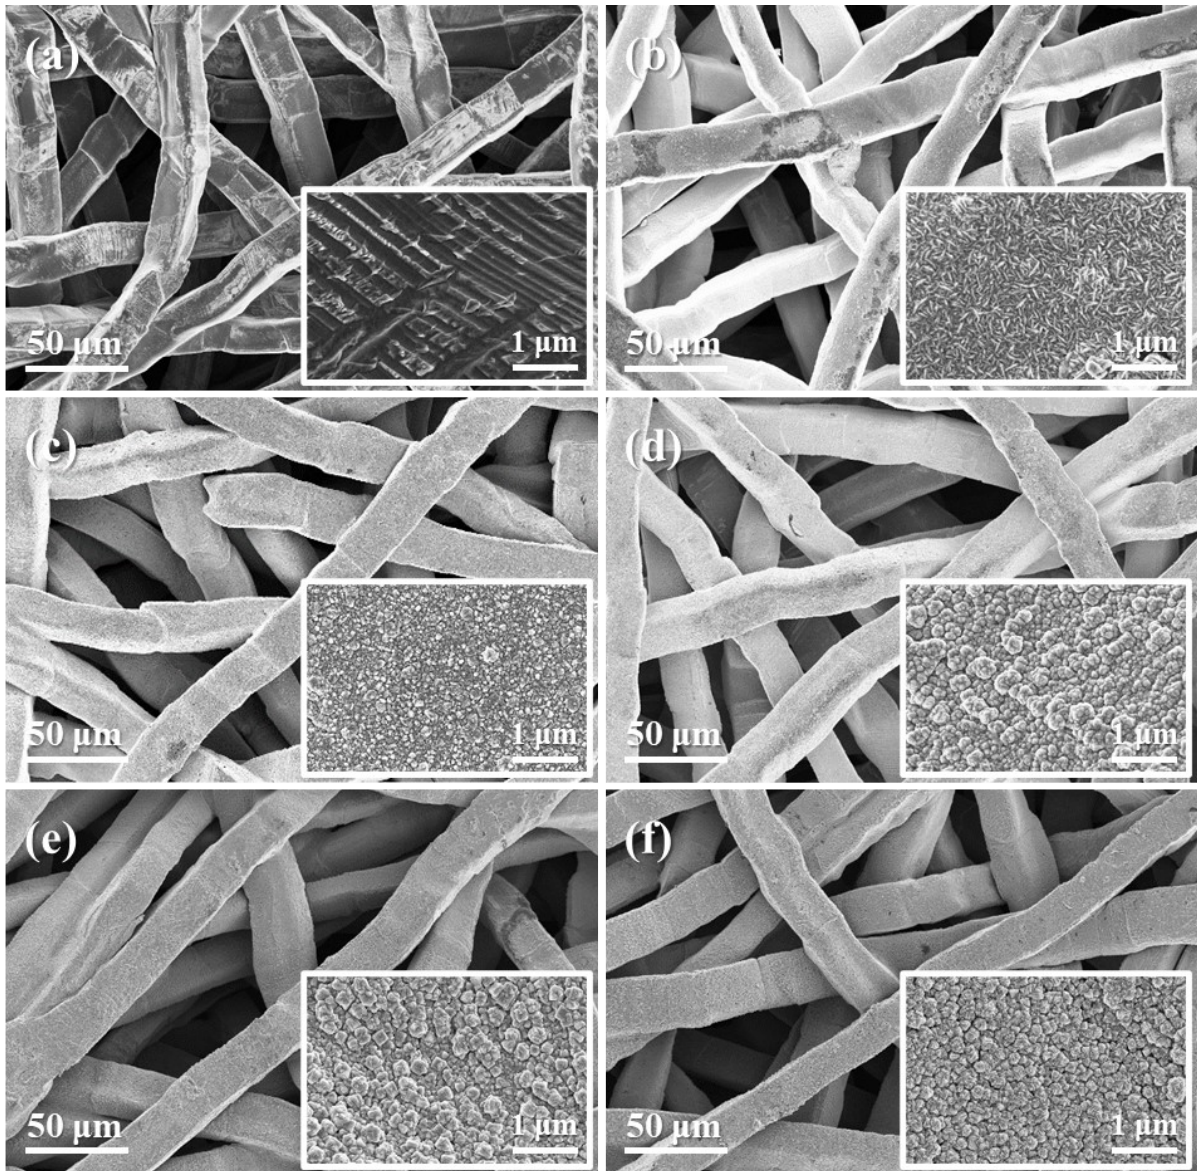

**Fig. S3** FESEM images of (a) bare TP, (b)  $\text{CoO}_x\text{H}_y/\text{TP}$ , (c)  $\text{Co}_{65}\text{Fe}_{35}\text{O}_x\text{H}_y/\text{TP}$ , (d)  $\text{Co}_{52}\text{Fe}_{48}\text{O}_x\text{H}_y/\text{TP}$ , (e)  $\text{Co}_{47}\text{Fe}_{53}\text{O}_x\text{H}_y/\text{TP}$ , and (f)  $\text{FeO}_x\text{H}_y/\text{TP}$ . Insets: corresponding images at a higher magnification.

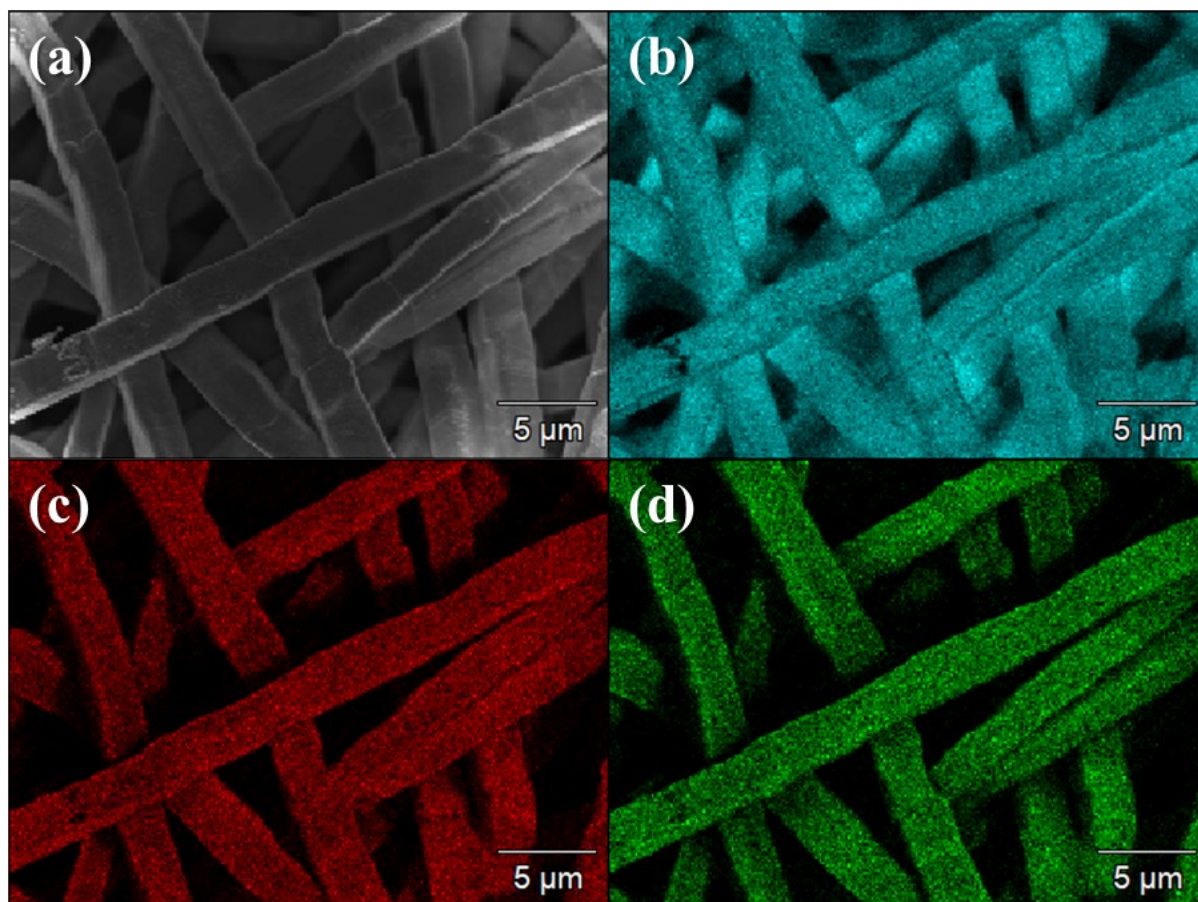

**Fig. S4** EDS mapping of  $\text{Co}_{65}\text{Fe}_{35}\text{O}_x\text{H}_y/\text{TP}$ . (a) FESEM image and elemental mapping images of: (b) O, (c) Co, and (d) Fe.

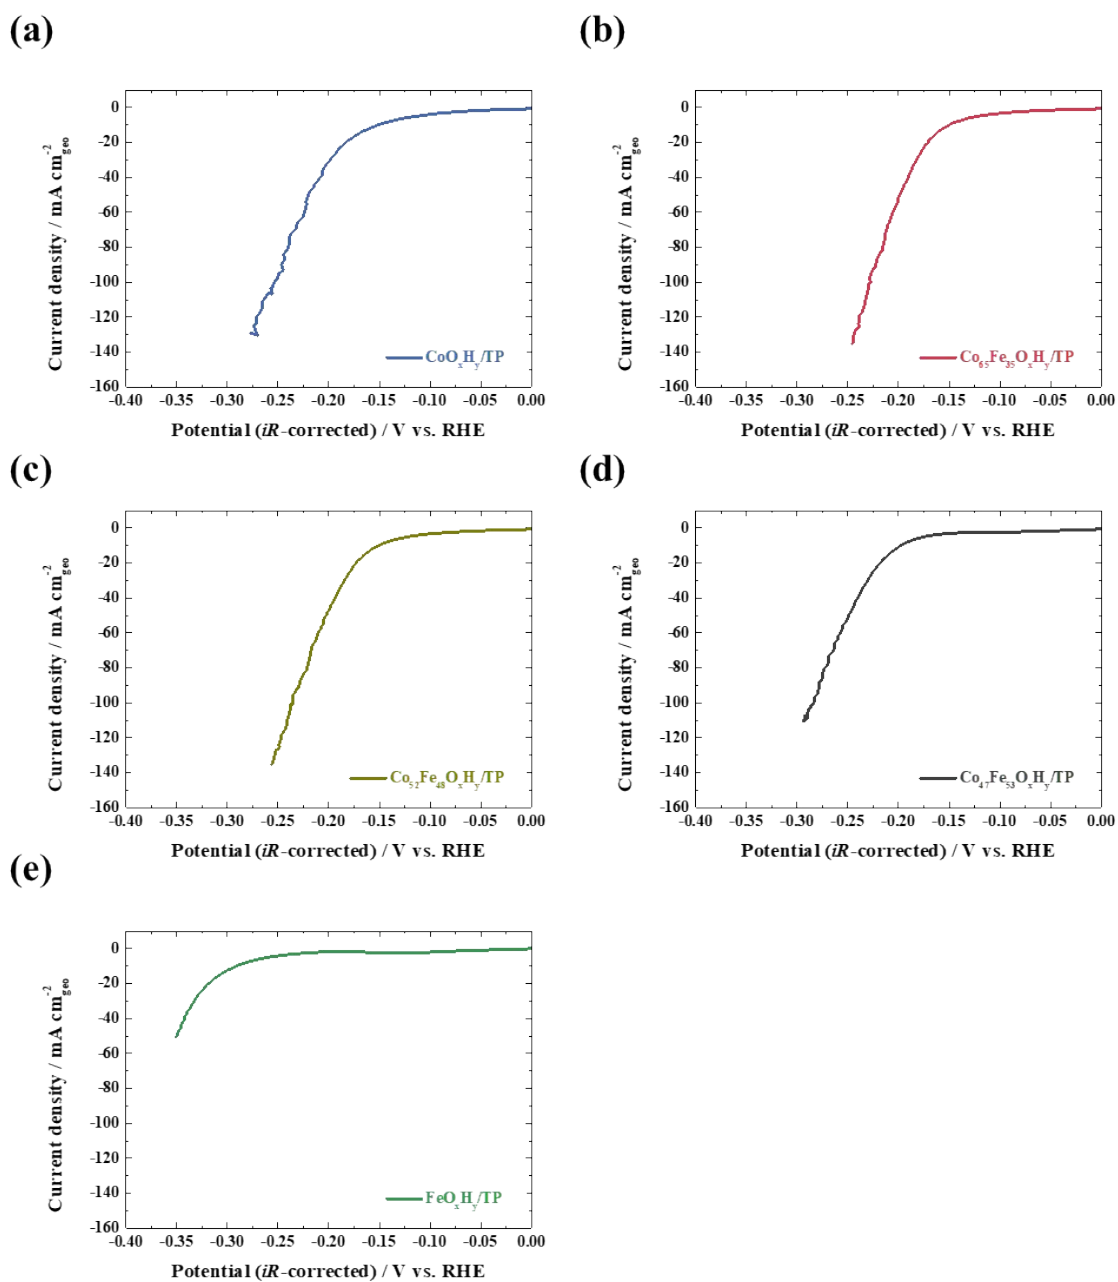

**Fig. S5** Polarization curves of HER activity at 5 mV/s in 1.0 M KOH: (a) CoO<sub>x</sub>H<sub>y</sub>/TP, (b) Co<sub>65</sub>Fe<sub>35</sub>O<sub>x</sub>H<sub>y</sub>/TP, (c) Co<sub>52</sub>Fe<sub>48</sub>O<sub>x</sub>H<sub>y</sub>/TP (d) Co<sub>47</sub>Fe<sub>53</sub>O<sub>x</sub>H<sub>y</sub>/TP, and (e) FeO<sub>x</sub>H<sub>y</sub>/TP.



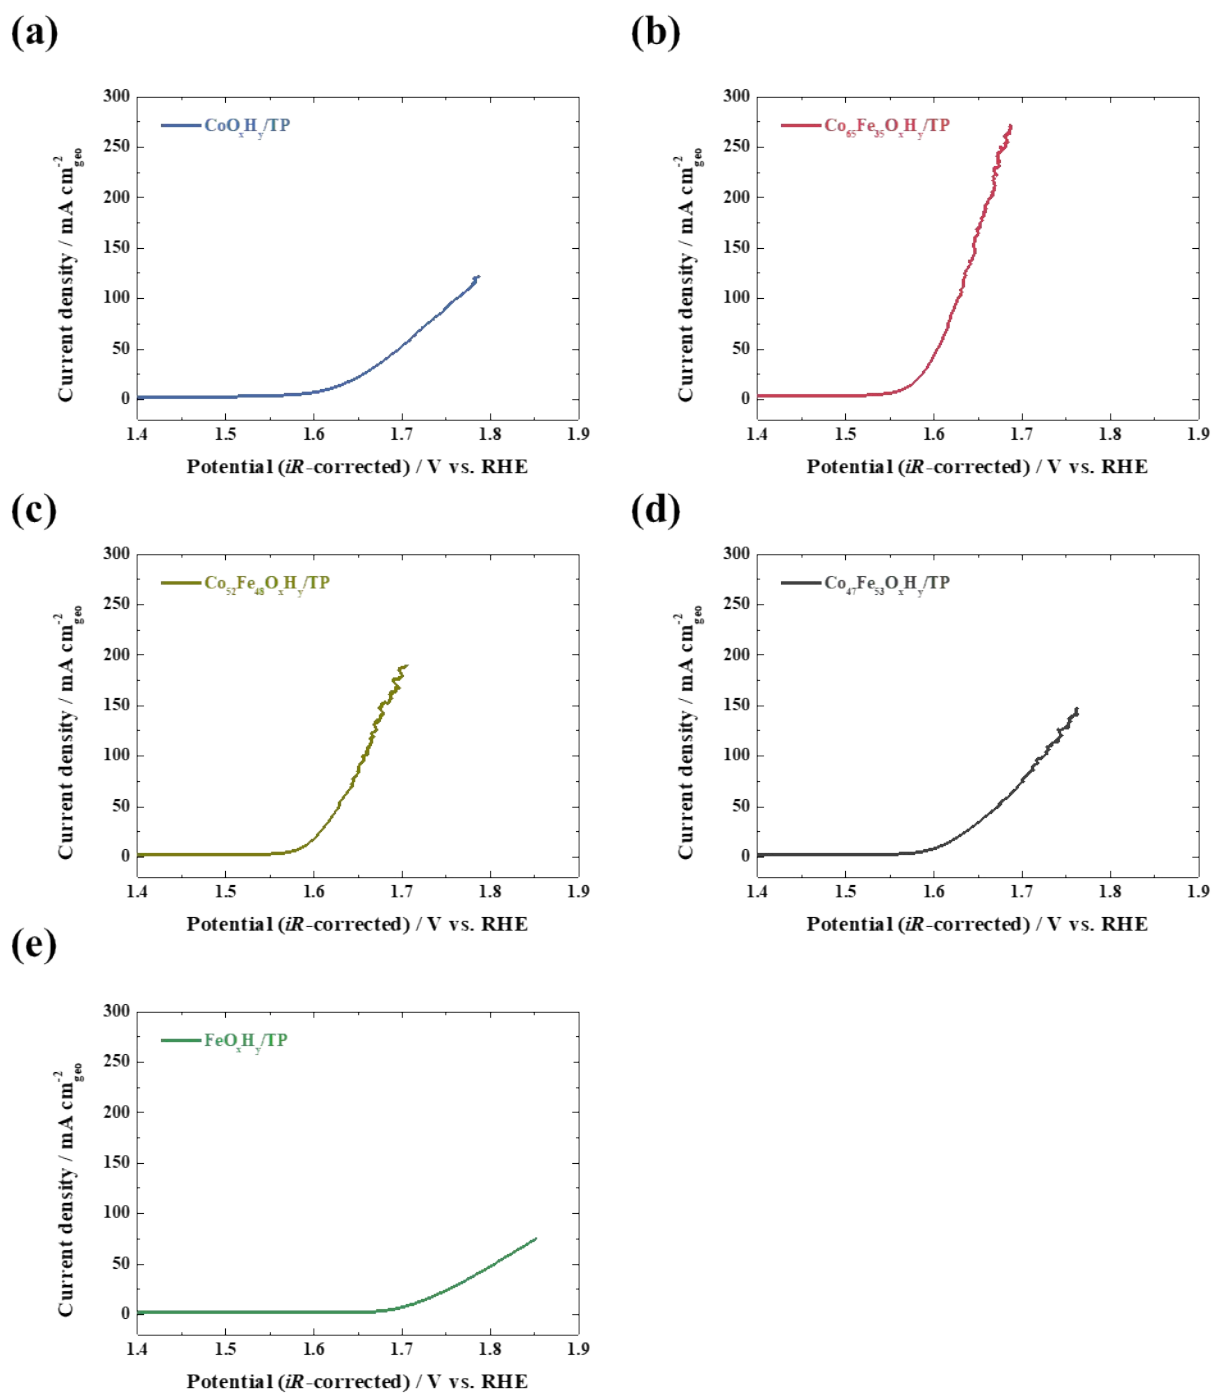

**Fig. S6** Polarization curves of OER activity at 5 mV/s in 1.0 M KOH: (a)  $\text{CoO}_x\text{H}_y/\text{TP}$ , (b)  $\text{Co}_{65}\text{Fe}_{35}\text{O}_x\text{H}_y/\text{TP}$ , (c)  $\text{Co}_{52}\text{Fe}_{48}\text{O}_x\text{H}_y/\text{TP}$  (d)  $\text{Co}_{47}\text{Fe}_{53}\text{O}_x\text{H}_y/\text{TP}$ , and (e)  $\text{FeO}_x\text{H}_y/\text{TP}$ .

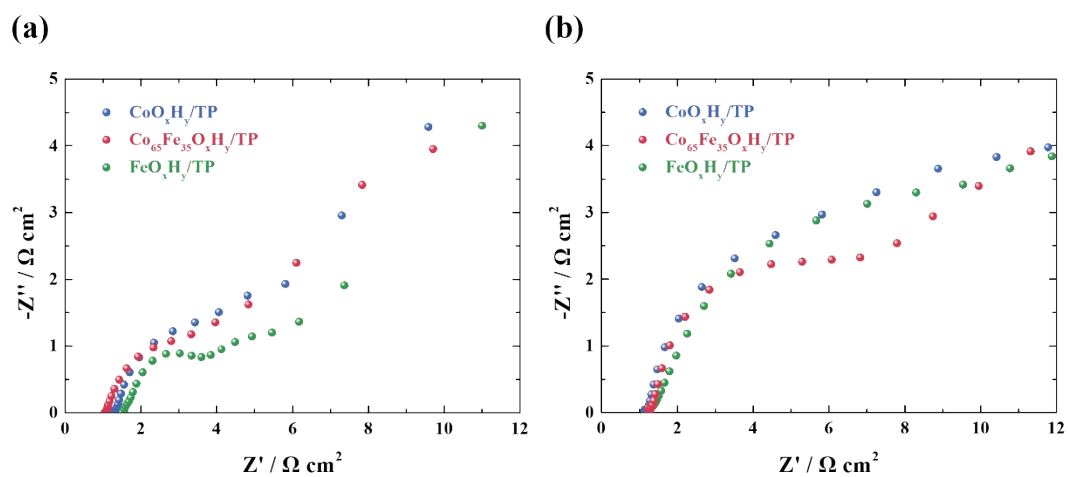

**Fig. S7** Nyquist plot of each electrode measured at current density of (a)  $10 \text{ mA cm}^{-2}$  for OER, and (b)  $-10 \text{ mA cm}^{-2}$  for HER.

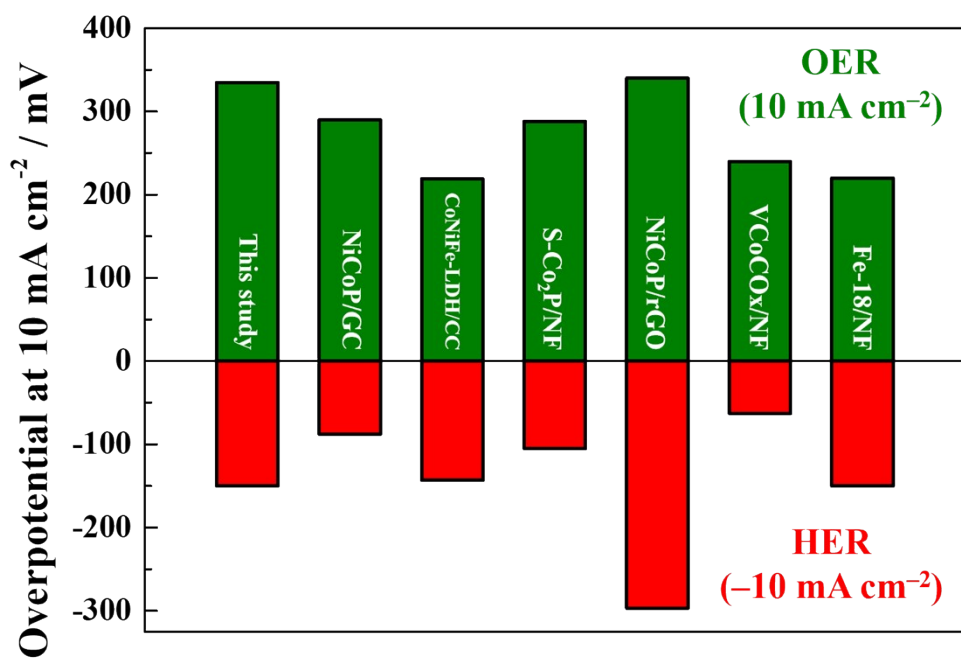

Fig. S8 Comparison of OER/HER overpotential in alkaline condition.

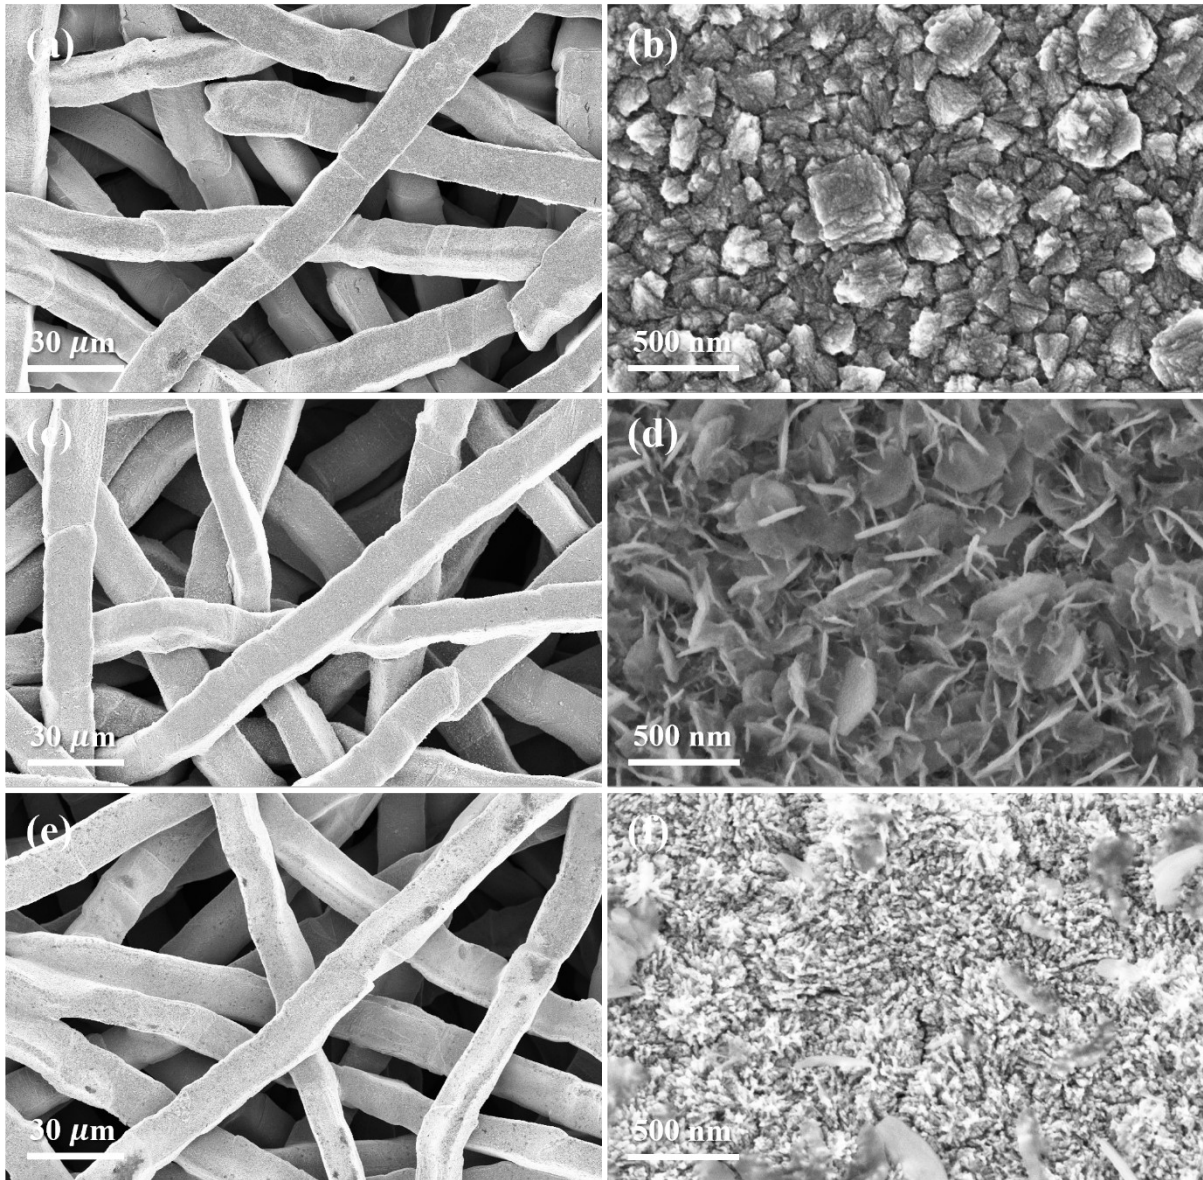

**Fig. S9** FESEM images of  $\text{Co}_{65}\text{Fe}_{35}\text{O}_x\text{H}_y/\text{TP}$  electrode. (a-b) pristine  $\text{Co}_{65}\text{Fe}_{35}\text{O}_x\text{H}_y/\text{TP}$ , (b) (c-d)  $\text{Co}_{65}\text{Fe}_{35}\text{O}_x\text{H}_y/\text{TP}$  after OER long-term stability test, (e-f)  $\text{Co}_{65}\text{Fe}_{35}\text{O}_x\text{H}_y/\text{TP}$  HER long-term stability test.

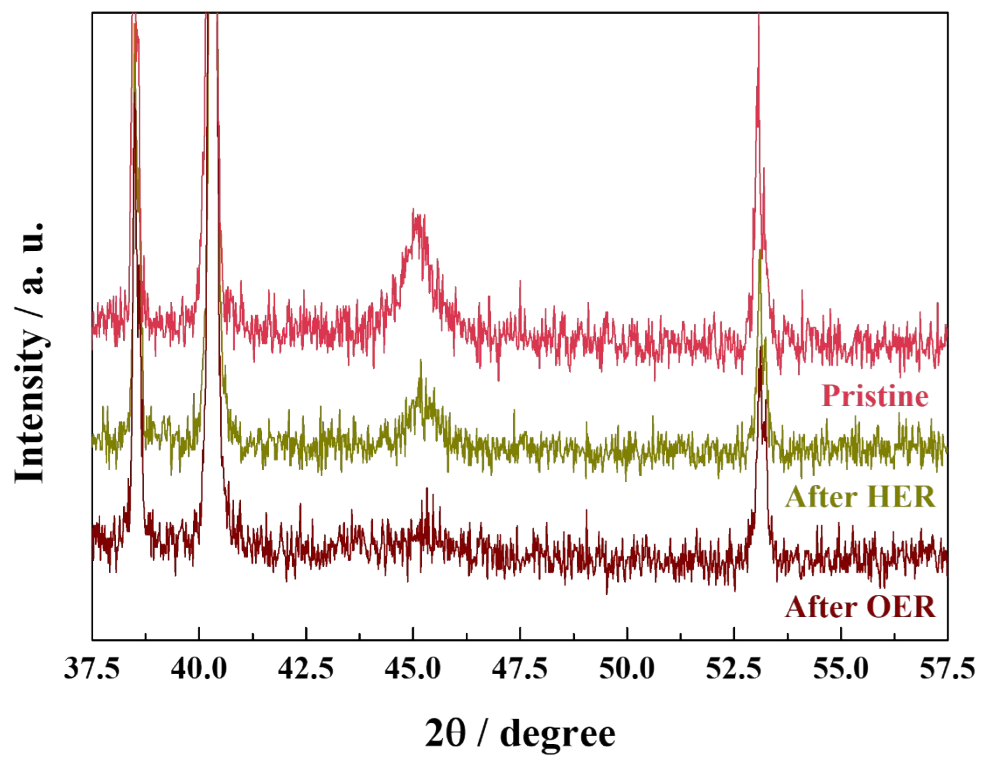

**Fig. S10** XRD patterns of the  $\text{Co}_{65}\text{Fe}_{35}\text{O}_x\text{H}_y/\text{TP}$  after HER/OER stability test.

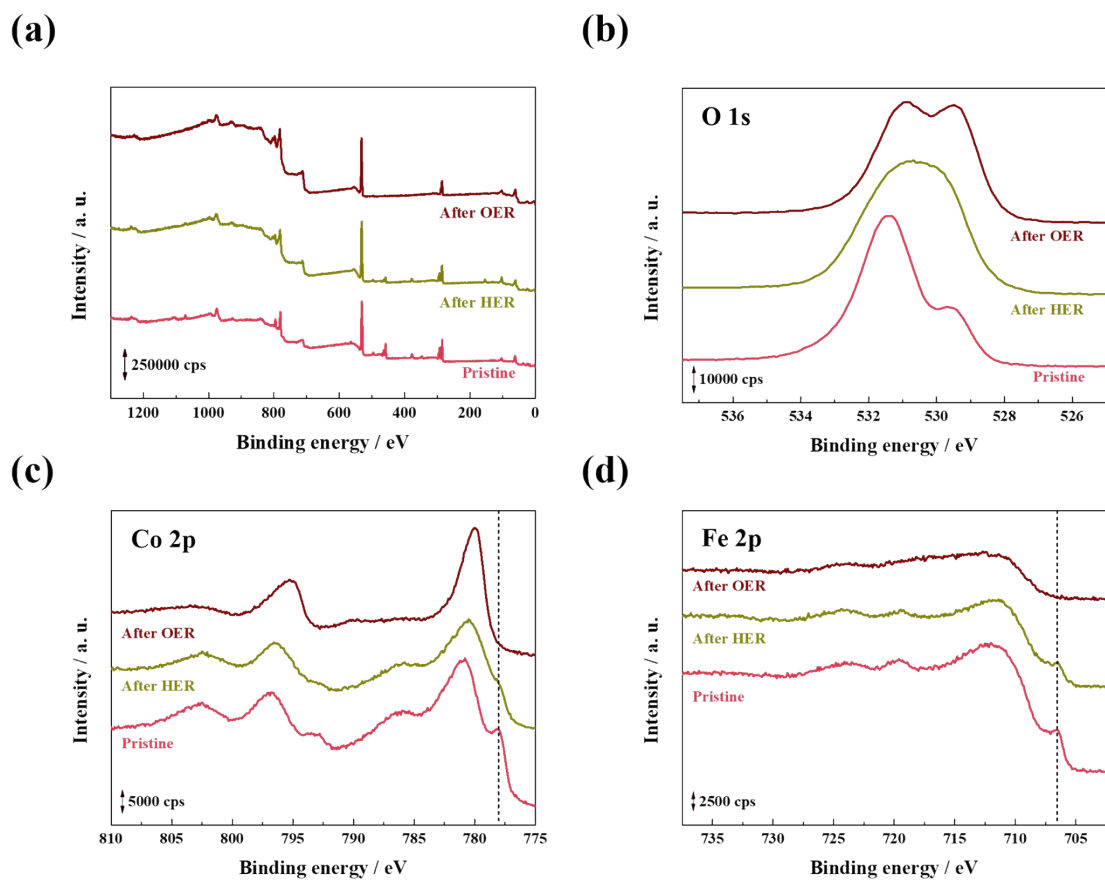

**Fig. S11** XPS spectra of pristine and after stability test for (a) survey peaks, (b) O 1s, (c) Co 2p, and (d) Fe 2p.

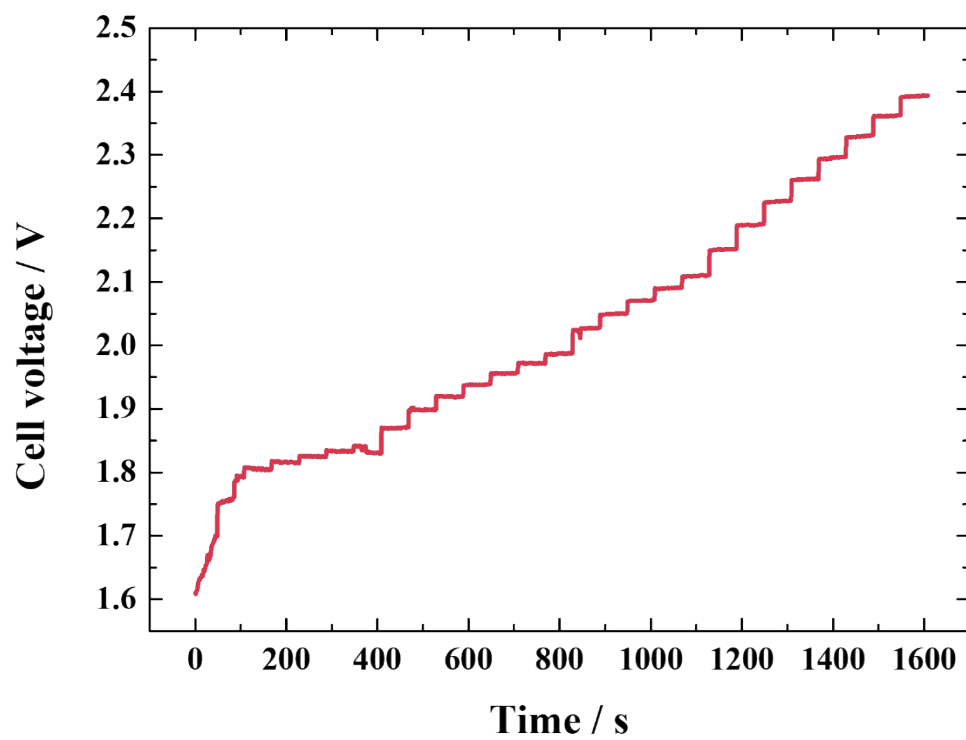

**Fig. S12** Chronoamperometric curves for the AEMWE with bifunctional  $\text{Co}_{65}\text{Fe}_{35}\text{O}_x\text{H}_y/\text{TP}$ .

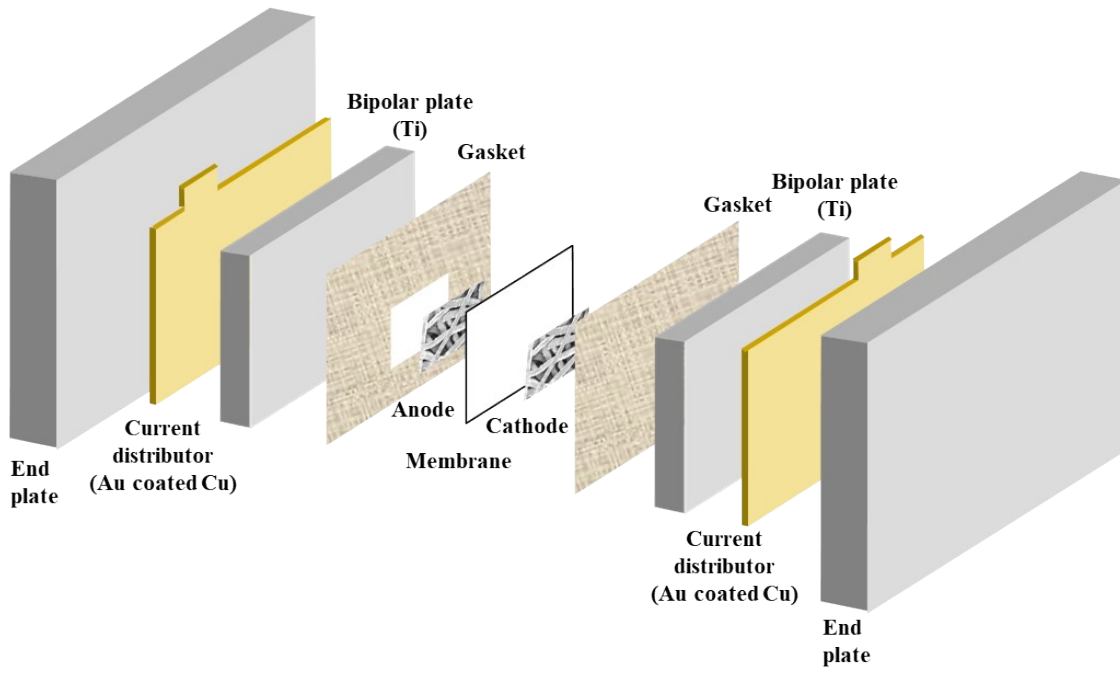

**Fig. S13** Configuration of AEMWE single-cell.
